# Supplementary material for: A study of changes in the heat capacity of carbon nanotube-based ionanofluids prepared from a series of imidazolium ionic liquids
Source: Royal Society of Chemistry journal article supplement (doi:10.1039/d2cp02110b), 2022-01-01
Supplement: d2cp02110b2.pdf [file d2cp02110b2.pdf]

Table-1-C2mim Tf2n

TI – Tolerance Interval  $Z_{oL}:Z_{oU}$   
 DI – Interval of Typical Data  $Z_L:Z_U$   
 LEL – Local Estimate of Location  $Z_o$

| Temp.[C] | [C2mim][Tf2N] [J/gK] |             |             |             |             |
|----------|----------------------|-------------|-------------|-------------|-------------|
|          | $Z_L$                | $Z_{oL}$    | $Z_o$       | $Z_{oU}$    | $Z_U$       |
| 20       | 1.287440421          | 1.288476899 | 1.288898144 | 1.289214993 | 1.289817968 |
| 21       | 1.289015624          | 1.290265128 | 1.291161666 | 1.29171509  | 1.292002832 |
| 22       | 1.290527265          | 1.291911143 | 1.292740359 | 1.293059911 | 1.293151862 |
| 23       | 1.292668365          | 1.293324036 | 1.293939889 | 1.294434288 | 1.294768481 |
| 24       | 1.293997028          | 1.294515717 | 1.294788312 | 1.295094368 | 1.295977837 |
| 25       | 1.295322118          | 1.295997075 | 1.296355098 | 1.296682808 | 1.297160831 |
| 26       | 1.296599597          | 1.297269011 | 1.297591376 | 1.297913967 | 1.298585416 |
| 27       | 1.297916648          | 1.298553984 | 1.298824221 | 1.299078441 | 1.299566166 |
| 28       | 1.299298358          | 1.29995581  | 1.30020086  | 1.300448787 | 1.301146101 |
| 29       | 1.300612827          | 1.301080769 | 1.301286261 | 1.301507733 | 1.302184234 |
| 30       | 1.30192572           | 1.302313634 | 1.302592871 | 1.302930327 | 1.303768803 |
| 31       | 1.30328166           | 1.303829289 | 1.304045    | 1.304269164 | 1.30493391  |
| 32       | 1.304838591          | 1.304928216 | 1.305058766 | 1.305309349 | 1.306315725 |
| 33       | 1.3061149            | 1.306528588 | 1.306735239 | 1.306971226 | 1.307758311 |
| 34       | 1.307468959          | 1.307790229 | 1.307973477 | 1.30818849  | 1.308855803 |
| 35       | 1.308617958          | 1.309139031 | 1.309410491 | 1.309722658 | 1.310734445 |
| 36       | 1.309949228          | 1.310610049 | 1.310877439 | 1.311157999 | 1.311999102 |
| 37       | 1.311272693          | 1.311789277 | 1.312018628 | 1.312264744 | 1.312992759 |
| 38       | 1.312745009          | 1.313289317 | 1.313539515 | 1.313810604 | 1.314611226 |
| 39       | 1.313578689          | 1.314608163 | 1.31497778  | 1.315322947 | 1.316067962 |
| 40       | 1.31536001           | 1.315870431 | 1.316234431 | 1.31661011  | 1.317183966 |
| 41       | 1.316833811          | 1.317109044 | 1.317469599 | 1.317942882 | 1.318610043 |
| 42       | 1.318008624          | 1.318438176 | 1.318737689 | 1.31908906  | 1.319909471 |
| 43       | 1.319103323          | 1.319608639 | 1.320093232 | 1.320584578 | 1.321113473 |
| 44       | 1.320220871          | 1.320900851 | 1.321285872 | 1.321641058 | 1.322636161 |
| 45       | 1.321449761          | 1.322113442 | 1.322435747 | 1.322765537 | 1.323499671 |
| 46       | 1.322576444          | 1.323296366 | 1.323611235 | 1.323932422 | 1.32472188  |
| 47       | 1.323743936          | 1.324626793 | 1.325027303 | 1.325404618 | 1.326089992 |
| 48       | 1.325156497          | 1.325640512 | 1.326142547 | 1.326692863 | 1.327348588 |
| 49       | 1.326272447          | 1.326760549 | 1.327121646 | 1.327462857 | 1.327863166 |
| 50       | 1.327806519          | 1.327909089 | 1.328087146 | 1.328430352 | 1.329377339 |
| 51       | 1.328729345          | 1.329120186 | 1.329311072 | 1.329513064 | 1.330017859 |
| 52       | 1.329912588          | 1.3303704   | 1.330682987 | 1.330954543 | 1.331235669 |
| 53       | 1.330702086          | 1.331278648 | 1.331707426 | 1.332106883 | 1.332557738 |
| 54       | 1.331717757          | 1.332087408 | 1.332276572 | 1.332492027 | 1.333178222 |
| 55       | 1.333255765          | 1.333850267 | 1.334086217 | 1.334323325 | 1.334932033 |
| 56       | 1.333889798          | 1.334240957 | 1.334466706 | 1.334755608 | 1.335855926 |
| 57       | 1.329331517          | 1.334307599 | 1.335483383 | 1.336304827 | 1.337323778 |
| 58       | 1.336143825          | 1.33672162  | 1.3369602   | 1.337211924 | 1.337966931 |
| 59       | 1.337039618          | 1.337563944 | 1.337803988 | 1.338068552 | 1.338914817 |
| 60       | 1.338017559          | 1.338413692 | 1.339261199 | 1.339825714 | 1.339967366 |
| 61       | 1.338834978          | 1.339205301 | 1.339451195 | 1.339755288 | 1.340691586 |
| 62       | 1.340103366          | 1.340606311 | 1.340858559 | 1.341095661 | 1.341486878 |

Table-1-C2mim Tf2n

|    |             |             |             |             |             |
|----|-------------|-------------|-------------|-------------|-------------|
| 63 | 1.340681704 | 1.341372638 | 1.341975414 | 1.342399029 | 1.342818085 |
| 64 | 1.341331586 | 1.341973168 | 1.342339034 | 1.342736575 | 1.343649528 |
| 65 | 1.342354729 | 1.342991935 | 1.343460917 | 1.34390954  | 1.344454412 |
| 66 | 1.341671799 | 1.343085894 | 1.343550223 | 1.343876274 | 1.344224882 |
| 67 | 1.343747768 | 1.344524918 | 1.344815723 | 1.345063548 | 1.345455255 |
| 68 | 1.343819734 | 1.34401688  | 1.344217776 | 1.344554747 | 1.346439407 |
| 69 | 1.345326172 | 1.345404277 | 1.345641273 | 1.346200505 | 1.347142275 |

Table-1-C2mim Tf2n

TI – Tolerance Interval  $Z_{OL}:Z_{OU}$   
 DI – Interval of Typical Data  $Z_L:Z_U$   
 LEL – Local Estimate of Location  $Z_0$

| Temp.[C] | [C2mim][Tf2N] + MWCNT (1% wt.) [J/gK] |            |            |            |            |
|----------|---------------------------------------|------------|------------|------------|------------|
|          | $Z_L$                                 | $Z_{OL}$   | $Z_0$      | $Z_{OU}$   | $Z_U$      |
| 20       | 1.25369301                            | 1.25991284 | 1.26654993 | 1.2724266  | 1.27666691 |
| 21       | 1.25542507                            | 1.26118174 | 1.2700468  | 1.27596706 | 1.27782982 |
| 22       | 1.25722171                            | 1.26239712 | 1.26550413 | 1.26899561 | 1.2916707  |
| 23       | 1.2590402                             | 1.26446112 | 1.26821673 | 1.27195229 | 1.29156048 |
| 24       | 1.25930165                            | 1.26549524 | 1.27226027 | 1.27793846 | 1.28171758 |
| 25       | 1.26135338                            | 1.26690447 | 1.27070088 | 1.27446403 | 1.29414852 |
| 26       | 1.26224807                            | 1.26723628 | 1.27048654 | 1.27406503 | 1.29483087 |
| 27       | 1.26364108                            | 1.2686006  | 1.27205207 | 1.2757503  | 1.29726065 |
| 28       | 1.26429866                            | 1.26968073 | 1.27290532 | 1.2764401  | 1.29785367 |
| 29       | 1.26493056                            | 1.2725753  | 1.27830769 | 1.28325351 | 1.28785107 |
| 30       | 1.26725597                            | 1.27212804 | 1.27587186 | 1.27975025 | 1.29932512 |
| 31       | 1.26745                               | 1.2731738  | 1.27605098 | 1.2793545  | 1.30494054 |
| 32       | 1.26941419                            | 1.27459855 | 1.27788776 | 1.28148459 | 1.30275766 |
| 33       | 1.27008168                            | 1.2754507  | 1.28383179 | 1.28979258 | 1.29258052 |
| 34       | 1.27190096                            | 1.27623206 | 1.28004528 | 1.28417943 | 1.30732032 |
| 35       | 1.27252418                            | 1.27613102 | 1.28079836 | 1.28701185 | 1.30200955 |
| 36       | 1.27368766                            | 1.27797837 | 1.28428506 | 1.29096505 | 1.29883043 |
| 37       | 1.27498356                            | 1.27835615 | 1.28374607 | 1.29059053 | 1.30068437 |
| 38       | 1.27589217                            | 1.28093869 | 1.28658445 | 1.29284121 | 1.30042461 |
| 39       | 1.27714221                            | 1.28234985 | 1.29018504 | 1.2971192  | 1.30119711 |
| 40       | 1.27824786                            | 1.2827026  | 1.29134616 | 1.29865942 | 1.30202752 |
| 41       | 1.27877019                            | 1.28575257 | 1.28915332 | 1.29285999 | 1.31540936 |
| 42       | 1.28086223                            | 1.28499104 | 1.28881023 | 1.29326306 | 1.32188136 |
| 43       | 1.28151064                            | 1.28550999 | 1.28913801 | 1.29354597 | 1.32441691 |
| 44       | 1.28283078                            | 1.28642973 | 1.29024053 | 1.2948407  | 1.32439348 |
| 45       | 1.28398596                            | 1.28884108 | 1.29269218 | 1.29700809 | 1.32368969 |
| 46       | 1.28552296                            | 1.29046551 | 1.29443299 | 1.29868679 | 1.32181894 |
| 47       | 1.28542285                            | 1.29196171 | 1.29746117 | 1.30334364 | 1.31215138 |
| 48       | 1.2872129                             | 1.29267513 | 1.29931993 | 1.30680122 | 1.31354148 |
| 49       | 1.28701642                            | 1.29368764 | 1.29987429 | 1.30577376 | 1.31298477 |
| 50       | 1.28940141                            | 1.29473346 | 1.29893577 | 1.30339394 | 1.32645723 |
| 51       | 1.28902802                            | 1.29418873 | 1.30029107 | 1.30732221 | 1.31580383 |
| 52       | 1.29055497                            | 1.29353057 | 1.3035704  | 1.3130976  | 1.31694872 |
| 53       | 1.29104476                            | 1.29626381 | 1.30013124 | 1.30471048 | 1.33525224 |
| 54       | 1.29172553                            | 1.29716816 | 1.30345393 | 1.3107423  | 1.32073851 |
| 55       | 1.29328038                            | 1.29741846 | 1.30302589 | 1.31030048 | 1.32140325 |
| 56       | 1.2912371                             | 1.30256729 | 1.30890742 | 1.31430387 | 1.32049248 |
| 57       | 1.29377509                            | 1.30270598 | 1.30675345 | 1.31084958 | 1.3317781  |
| 58       | 1.29524486                            | 1.30068826 | 1.30395645 | 1.30795211 | 1.34010023 |
| 59       | 1.27806036                            | 1.31139901 | 1.31602525 | 1.31971398 | 1.32434174 |
| 60       | 1.29748169                            | 1.30198131 | 1.30950601 | 1.31899633 | 1.3252446  |
| 61       | 1.2973769                             | 1.30171636 | 1.30816703 | 1.31650334 | 1.33381508 |
| 62       | 1.29913491                            | 1.3044499  | 1.31447129 | 1.32264437 | 1.32765016 |

Table-1-C2mim Tf2n

|    |            |            |            |            |            |
|----|------------|------------|------------|------------|------------|
| 63 | 1.29882751 | 1.30485371 | 1.31354569 | 1.32244075 | 1.32934036 |
| 64 | 1.28401332 | 1.3157835  | 1.32182784 | 1.32653656 | 1.33000213 |
| 65 | 1.30084936 | 1.30873152 | 1.31469797 | 1.32039292 | 1.33949526 |
| 66 | 1.30090986 | 1.3100615  | 1.31786615 | 1.32495814 | 1.33161196 |
| 67 | 1.30212704 | 1.30920018 | 1.31934318 | 1.32814833 | 1.33308745 |
| 68 | 1.30227536 | 1.30761951 | 1.31974059 | 1.32992329 | 1.33441831 |
| 69 | 1.30407254 | 1.31105328 | 1.31620185 | 1.3215553  | 1.35046973 |

Table-2-C4mim Tf2N

TI – Tolerance Interval  $Z_{oL}:Z_{oU}$   
 DI – Interval of Typical Data  $Z_L:Z_U$   
 LEL – Local Estimate of Location  $Z_o$

| Temp.[C] | [C4mim][Tf2N] [J/gK] |             |             |             |             |
|----------|----------------------|-------------|-------------|-------------|-------------|
|          | $Z_L$                | $Z_{oL}$    | $Z_o$       | $Z_{oU}$    | $Z_U$       |
| 20       | 1.349583953          | 1.350609636 | 1.351364253 | 1.351938147 | 1.35236293  |
| 21       | 1.351665161          | 1.35265308  | 1.353645955 | 1.354384812 | 1.354797211 |
| 22       | 1.35313178           | 1.353629539 | 1.354413731 | 1.355353921 | 1.356208368 |
| 23       | 1.354211463          | 1.355388319 | 1.356116715 | 1.356741389 | 1.35742245  |
| 24       | 1.356016517          | 1.356631808 | 1.357230883 | 1.357922104 | 1.358931311 |
| 25       | 1.35726877           | 1.358108043 | 1.358801892 | 1.359476273 | 1.360237947 |
| 26       | 1.358446244          | 1.359027722 | 1.359818529 | 1.360658077 | 1.361354035 |
| 27       | 1.359976184          | 1.360270017 | 1.360724646 | 1.361367635 | 1.362241938 |
| 28       | 1.361006475          | 1.361575433 | 1.362156979 | 1.362831498 | 1.363773812 |
| 29       | 1.362295469          | 1.363028223 | 1.363946452 | 1.364830414 | 1.365484354 |
| 30       | 1.364065011          | 1.364247968 | 1.364821965 | 1.365902075 | 1.366933201 |
| 31       | 1.365456706          | 1.365692205 | 1.366379031 | 1.367390324 | 1.368051899 |
| 32       | 1.366722043          | 1.36700616  | 1.367539873 | 1.368439103 | 1.369875985 |
| 33       | 1.368054244          | 1.368442508 | 1.369108357 | 1.370011857 | 1.370982796 |
| 34       | 1.369516764          | 1.369884995 | 1.370452062 | 1.371256084 | 1.372363461 |
| 35       | 1.370859743          | 1.371174676 | 1.371726569 | 1.372609476 | 1.373982202 |
| 36       | 1.372458436          | 1.372460842 | 1.372462    | 1.372463158 | 1.372465564 |
| 37       | 1.373456163          | 1.37405687  | 1.374599346 | 1.375273589 | 1.37661816  |
| 38       | 1.374690997          | 1.375174602 | 1.375750832 | 1.376564376 | 1.378174014 |
| 39       | 1.376438746          | 1.376623207 | 1.377005939 | 1.377758092 | 1.37930974  |
| 40       | 1.377735608          | 1.378016648 | 1.378372237 | 1.378885263 | 1.379873282 |
| 41       | 1.378986749          | 1.379661174 | 1.380110727 | 1.380626209 | 1.381804937 |
| 42       | 1.380715923          | 1.381002555 | 1.381331368 | 1.381849981 | 1.383447354 |
| 43       | 1.382115427          | 1.382966314 | 1.38333708  | 1.383729132 | 1.384843756 |
| 44       | 1.383611245          | 1.384164843 | 1.384482062 | 1.384841204 | 1.385796829 |
| 45       | 1.384761858          | 1.385221849 | 1.385499863 | 1.38589701  | 1.386956857 |
| 46       | 1.386057042          | 1.38654346  | 1.386910062 | 1.387373442 | 1.388647473 |
| 47       | 1.386245737          | 1.387426242 | 1.387787188 | 1.388084452 | 1.388573172 |
| 48       | 1.388724393          | 1.389120967 | 1.389599476 | 1.390257379 | 1.391437835 |
| 49       | 1.390240097          | 1.390375867 | 1.390692875 | 1.391457724 | 1.393841473 |
| 50       | 1.391484575          | 1.391879664 | 1.39219897  | 1.392663112 | 1.39478302  |
| 51       | 1.393203232          | 1.393540515 | 1.393991742 | 1.394680517 | 1.396121135 |
| 52       | 1.394229588          | 1.394608878 | 1.39518087  | 1.39607663  | 1.397740389 |
| 53       | 1.395576603          | 1.396048829 | 1.396476592 | 1.397000208 | 1.397991921 |
| 54       | 1.397012245          | 1.397307855 | 1.397779105 | 1.398566236 | 1.400177348 |
| 55       | 1.397467874          | 1.39876792  | 1.399255901 | 1.399812408 | 1.40093875  |
| 56       | 1.399516969          | 1.400402044 | 1.400925574 | 1.401466676 | 1.402477477 |
| 57       | 1.401184875          | 1.401352205 | 1.401521472 | 1.40180415  | 1.403377952 |
| 58       | 1.402913935          | 1.403745465 | 1.404087471 | 1.404424128 | 1.405197107 |
| 59       | 1.404470791          | 1.405109274 | 1.405402328 | 1.40569374  | 1.406316595 |
| 60       | 1.403807243          | 1.404533261 | 1.405182671 | 1.405931525 | 1.407140333 |
| 61       | 1.404094517          | 1.406290426 | 1.40696189  | 1.407528842 | 1.408530132 |
| 62       | 1.406524559          | 1.406920971 | 1.407497724 | 1.408307219 | 1.409483238 |

Table-2-C4mim Tf2N

|    |             |             |             |             |             |
|----|-------------|-------------|-------------|-------------|-------------|
| 63 | 1.408087258 | 1.408849625 | 1.410000746 | 1.410817201 | 1.411119364 |
| 64 | 1.408781332 | 1.409567637 | 1.410427017 | 1.411289965 | 1.412086597 |
| 65 | 1.411960724 | 1.412099034 | 1.412424471 | 1.412753645 | 1.412896174 |
| 66 | 1.412716091 | 1.412851361 | 1.41318348  | 1.413892027 | 1.415240829 |
| 67 | 1.413544384 | 1.414029745 | 1.414296957 | 1.414615799 | 1.415743666 |
| 68 | 1.414121427 | 1.415357407 | 1.416165543 | 1.416827157 | 1.417449894 |
| 69 | 1.415931921 | 1.417075775 | 1.417655414 | 1.418180278 | 1.418953554 |
| 70 | 1.416915608 | 1.417554481 | 1.418127608 | 1.418761574 | 1.420812936 |

Table-2-C4mim Tf2N

TI – Tolerance Interval  $Z_{OL}:Z_{OU}$   
 DI – Interval of Typical Data  $Z_L:Z_U$   
 LEL – Local Estimate of Location  $Z_0$

| Temp.[C] | [C4mim][Tf2N] + MWCNT (1% wt.) [J/gK] |             |             |             |             |
|----------|---------------------------------------|-------------|-------------|-------------|-------------|
|          | $Z_L$                                 | $Z_{OL}$    | $Z_0$       | $Z_{OU}$    | $Z_U$       |
| 20       | 1.343208442                           | 1.344120177 | 1.344920883 | 1.345263504 | 1.34535431  |
| 21       | 1.345818558                           | 1.346349769 | 1.346817332 | 1.347257422 | 1.347692525 |
| 22       | 1.347140672                           | 1.347449171 | 1.34839732  | 1.348902077 | 1.348970692 |
| 23       | 1.348437678                           | 1.349063563 | 1.349458118 | 1.349836821 | 1.350935854 |
| 24       | 1.350108742                           | 1.35024295  | 1.350742592 | 1.351487074 | 1.351859071 |
| 25       | 1.351353027                           | 1.351493903 | 1.35215141  | 1.352987077 | 1.353239991 |
| 26       | 1.352571257                           | 1.352679032 | 1.353454631 | 1.354204177 | 1.354303764 |
| 27       | 1.353969741                           | 1.354078034 | 1.354618836 | 1.355349284 | 1.35557429  |
| 28       | 1.355375092                           | 1.355660173 | 1.356133653 | 1.356686625 | 1.357134835 |
| 29       | 1.356716383                           | 1.357005293 | 1.357526663 | 1.358176519 | 1.358723355 |
| 30       | 1.358047933                           | 1.358303995 | 1.358991105 | 1.359677095 | 1.359932087 |
| 31       | 1.359586786                           | 1.360083831 | 1.360508847 | 1.360958224 | 1.361562161 |
| 32       | 1.360445344                           | 1.361346331 | 1.361693722 | 1.36208894  | 1.362863898 |
| 33       | 1.361439072                           | 1.362782394 | 1.363243578 | 1.363721991 | 1.36447229  |
| 34       | 1.363444461                           | 1.363777862 | 1.36440235  | 1.365250707 | 1.366068011 |
| 35       | 1.364507231                           | 1.365655379 | 1.366079173 | 1.366553762 | 1.36746996  |
| 36       | 1.366444047                           | 1.366475878 | 1.366574814 | 1.366905331 | 1.368637916 |
| 37       | 1.367405066                           | 1.367564163 | 1.368257602 | 1.369690879 | 1.370730518 |
| 38       | 1.369034425                           | 1.369429412 | 1.369932606 | 1.370672709 | 1.372167455 |
| 39       | 1.370537698                           | 1.371135642 | 1.371515832 | 1.371954132 | 1.373041544 |
| 40       | 1.371991676                           | 1.372258858 | 1.372664892 | 1.373259375 | 1.374165805 |
| 41       | 1.373279483                           | 1.373930612 | 1.374371566 | 1.374875228 | 1.375988989 |
| 42       | 1.374905883                           | 1.375052771 | 1.375488904 | 1.376402359 | 1.377597682 |
| 43       | 1.376232078                           | 1.376858112 | 1.37736168  | 1.377938666 | 1.378979111 |
| 44       | 1.377523906                           | 1.378005297 | 1.378532546 | 1.3792255   | 1.380477645 |
| 45       | 1.37911203                            | 1.379491723 | 1.380162184 | 1.381023332 | 1.381814867 |
| 46       | 1.380303702                           | 1.380823026 | 1.381400969 | 1.382122807 | 1.3832279   |
| 47       | 1.380813542                           | 1.381852741 | 1.38222616  | 1.382596945 | 1.383599713 |
| 48       | 1.382697413                           | 1.38362955  | 1.384803119 | 1.385503297 | 1.385734142 |
| 49       | 1.38432944                            | 1.385142617 | 1.386052044 | 1.386914514 | 1.387605416 |
| 50       | 1.385983859                           | 1.386308429 | 1.386575467 | 1.386948128 | 1.388282741 |
| 51       | 1.387482716                           | 1.387986755 | 1.388926534 | 1.389536726 | 1.389702724 |
| 52       | 1.390492433                           | 1.390597454 | 1.390651    | 1.390704671 | 1.390810765 |
| 53       | 1.389269882                           | 1.390108593 | 1.390541311 | 1.391111488 | 1.392499784 |
| 54       | 1.391344834                           | 1.391421961 | 1.391591691 | 1.392000317 | 1.393468671 |
| 55       | 1.392440907                           | 1.393188982 | 1.393854704 | 1.394365113 | 1.394696076 |
| 56       | 1.393224786                           | 1.394453356 | 1.395332057 | 1.395829631 | 1.39605522  |
| 57       | 1.395384401                           | 1.395710824 | 1.395918886 | 1.396156408 | 1.396722963 |
| 58       | 1.39686524                            | 1.398179654 | 1.398425284 | 1.39857667  | 1.398733288 |
| 59       | 1.399616648                           | 1.399840074 | 1.399938    | 1.400020996 | 1.400134117 |
| 60       | 1.39847079                            | 1.398765655 | 1.399453161 | 1.400465925 | 1.401341641 |
| 61       | 1.398200751                           | 1.400897038 | 1.401517776 | 1.401918708 | 1.402341746 |
| 62       | 1.401419553                           | 1.401767727 | 1.402169214 | 1.40251695  | 1.402744061 |

Table-2-C4mim Tf2N

|    |             |             |             |             |             |
|----|-------------|-------------|-------------|-------------|-------------|
| 63 | 1.402091759 | 1.403014004 | 1.403828532 | 1.404713479 | 1.405945793 |
| 64 | 1.403258725 | 1.404021761 | 1.404854687 | 1.40565125  | 1.406315589 |
| 65 | 1.406558395 | 1.406883947 | 1.407448481 | 1.408234066 | 1.409115336 |
| 66 | 1.406471597 | 1.407324538 | 1.407746772 | 1.408094686 | 1.408831269 |
| 67 | 1.407740141 | 1.407837706 | 1.408113226 | 1.408780354 | 1.410162308 |
| 68 | 1.409870542 | 1.411313585 | 1.411738231 | 1.412081257 | 1.412628411 |
| 69 | 1.40982329  | 1.41078739  | 1.411560653 | 1.412283576 | 1.413051024 |
| 70 | 1.411510312 | 1.413057018 | 1.413429146 | 1.413702843 | 1.414083622 |



Table-3-C6mim Tf2N

TI – Tolerance Interval  $Z_{0L}:Z_{0U}$   
 DI – Interval of Typical Data  $Z_L:Z_U$   
 LEL – Local Estimate of Location  $Z_0$

| Temp.[C] | [C6mim][Tf2N] [J/gK] |             |             |             |             |
|----------|----------------------|-------------|-------------|-------------|-------------|
|          | $Z_L$                | $Z_{0L}$    | $Z_0$       | $Z_{0U}$    | $Z_U$       |
| 20       | 1.419457066          | 1.420653374 | 1.421309475 | 1.421693488 | 1.421910026 |
| 21       | 1.421886542          | 1.423046916 | 1.423673606 | 1.424123498 | 1.424494638 |
| 22       | 1.423384308          | 1.424251963 | 1.424893298 | 1.425404176 | 1.425816815 |
| 23       | 1.424306482          | 1.4256294   | 1.426468754 | 1.426971019 | 1.427239705 |
| 24       | 1.426189674          | 1.427181554 | 1.427770627 | 1.428345285 | 1.429246438 |
| 25       | 1.42748764           | 1.428613685 | 1.429347963 | 1.429904303 | 1.430351644 |
| 26       | 1.428621579          | 1.429848906 | 1.430641145 | 1.431148737 | 1.431450218 |
| 27       | 1.430396489          | 1.431296783 | 1.431989476 | 1.432299716 | 1.432394774 |
| 28       | 1.431738001          | 1.43256246  | 1.433269631 | 1.433890448 | 1.434431205 |
| 29       | 1.433291664          | 1.43428048  | 1.434867514 | 1.435379791 | 1.435981832 |
| 30       | 1.434876106          | 1.435691736 | 1.436334839 | 1.436885964 | 1.437376615 |
| 31       | 1.436602289          | 1.437496156 | 1.437956062 | 1.43831176  | 1.438665814 |
| 32       | 1.437913793          | 1.438606421 | 1.439179741 | 1.439784724 | 1.440622336 |
| 33       | 1.43940483           | 1.440093917 | 1.440525994 | 1.440988182 | 1.441890864 |
| 34       | 1.440829294          | 1.441661324 | 1.442280709 | 1.442905064 | 1.443761402 |
| 35       | 1.442515084          | 1.443188459 | 1.443642295 | 1.444154911 | 1.445253133 |
| 36       | 1.443824152          | 1.444080617 | 1.444330542 | 1.444728259 | 1.446590262 |
| 37       | 1.445228247          | 1.445570248 | 1.446234386 | 1.447299436 | 1.448726741 |
| 38       | 1.446816007          | 1.44748965  | 1.447947061 | 1.44850302  | 1.450042341 |
| 39       | 1.448309347          | 1.449117024 | 1.44956224  | 1.450069433 | 1.451527453 |
| 40       | 1.449867306          | 1.450778761 | 1.451146971 | 1.451523545 | 1.452540403 |
| 41       | 1.451233262          | 1.452182746 | 1.452644639 | 1.453157759 | 1.454726742 |
| 42       | 1.452697262          | 1.453574904 | 1.454006415 | 1.454493629 | 1.456071675 |
| 43       | 1.4544257            | 1.455501649 | 1.455983272 | 1.456485651 | 1.457796949 |
| 44       | 1.456101738          | 1.456676734 | 1.457214359 | 1.457845799 | 1.458862683 |
| 45       | 1.45764867           | 1.458043325 | 1.458477187 | 1.459083244 | 1.460397027 |
| 46       | 1.458905398          | 1.45986436  | 1.460273804 | 1.460694893 | 1.461790373 |
| 47       | 1.459316834          | 1.460459575 | 1.460930698 | 1.461350788 | 1.462052739 |
| 48       | 1.461650932          | 1.46258605  | 1.46318972  | 1.463707397 | 1.464252626 |
| 49       | 1.463179105          | 1.464440591 | 1.464886846 | 1.465309969 | 1.466285227 |
| 50       | 1.465028152          | 1.465047579 | 1.465197035 | 1.466031066 | 1.467950292 |
| 51       | 1.466355191          | 1.467133982 | 1.467951868 | 1.468696114 | 1.469277961 |
| 52       | 1.467579109          | 1.468588811 | 1.46924433  | 1.469831564 | 1.470512933 |
| 53       | 1.469354272          | 1.470051307 | 1.470512283 | 1.4709416   | 1.471480367 |
| 54       | 1.470808098          | 1.470923149 | 1.471508177 | 1.47268657  | 1.473354129 |
| 55       | 1.471926607          | 1.47302354  | 1.473715531 | 1.474227714 | 1.474630576 |
| 56       | 1.472925524          | 1.474371804 | 1.474926691 | 1.475394139 | 1.476097642 |
| 57       | 1.475172643          | 1.475507311 | 1.475745131 | 1.476064288 | 1.477334673 |
| 58       | 1.478005326          | 1.478748719 | 1.478910545 | 1.479016739 | 1.479135285 |
| 59       | 1.477472392          | 1.479165057 | 1.479667934 | 1.480058465 | 1.48061661  |
| 60       | 1.47896005           | 1.479869809 | 1.480221658 | 1.480583192 | 1.481626039 |
| 61       | 1.47824721           | 1.481063055 | 1.481744872 | 1.482244532 | 1.482931387 |
| 62       | 1.480900588          | 1.48127862  | 1.481710232 | 1.482364142 | 1.484115428 |

Table-3-C6mim Tf2N

|    |             |             |             |             |             |
|----|-------------|-------------|-------------|-------------|-------------|
| 63 | 1.483615818 | 1.484758337 | 1.485119192 | 1.48533565  | 1.485609908 |
| 64 | 1.483550444 | 1.484594165 | 1.485070714 | 1.485570489 | 1.486873403 |
| 65 | 1.487220166 | 1.487372988 | 1.487787765 | 1.488530445 | 1.489316404 |
| 66 | 1.487159568 | 1.488536665 | 1.488982615 | 1.489396261 | 1.490345488 |
| 67 | 1.488812732 | 1.489031795 | 1.489237906 | 1.489559256 | 1.491034429 |
| 68 | 1.49120805  | 1.491895833 | 1.492053861 | 1.492157437 | 1.492270267 |
| 69 | 1.491463126 | 1.491671916 | 1.492187775 | 1.493175372 | 1.49458014  |
| 70 | 1.493487251 | 1.494071735 | 1.494295466 | 1.49450488  | 1.494936477 |

Table-3-C6mim Tf2N

TI – Tolerance Interval                       $Z_{OL}:Z_{OU}$   
 DI – Interval of Typical Data               $Z_L:Z_U$   
 LEL – Local Estimate of Location         $Z_0$

| Temp.[C] | [C6mim][Tf2N] + MWCNT (1% wt.) [J/gK] |             |             |             |             |
|----------|---------------------------------------|-------------|-------------|-------------|-------------|
|          | $Z_L$                                 | $Z_{OL}$    | $Z_0$       | $Z_{OU}$    | $Z_U$       |
| 20       | 1.414166354                           | 1.414648975 | 1.415042657 | 1.415487629 | 1.416245266 |
| 21       | 1.415919726                           | 1.416437734 | 1.417211166 | 1.41778953  | 1.418024241 |
| 22       | 1.417416681                           | 1.41814527  | 1.418879926 | 1.419322417 | 1.419496976 |
| 23       | 1.418368995                           | 1.419017509 | 1.419829451 | 1.420632449 | 1.421259663 |
| 24       | 1.420220438                           | 1.420566056 | 1.42113784  | 1.421877    | 1.422622873 |
| 25       | 1.421727434                           | 1.421821474 | 1.422477913 | 1.42361347  | 1.423961112 |
| 26       | 1.423084399                           | 1.423520097 | 1.424016977 | 1.42460348  | 1.425355251 |
| 27       | 1.424621352                           | 1.425099437 | 1.425493432 | 1.425899145 | 1.426428892 |
| 28       | 1.426185251                           | 1.426450355 | 1.426878859 | 1.427522083 | 1.428478614 |
| 29       | 1.42696468                            | 1.428142006 | 1.428549693 | 1.428976964 | 1.429665756 |
| 30       | 1.429434717                           | 1.429547217 | 1.429974696 | 1.430766988 | 1.431332432 |
| 31       | 1.431084789                           | 1.431208537 | 1.431462911 | 1.431944907 | 1.432855843 |
| 32       | 1.432176113                           | 1.432736915 | 1.433011111 | 1.433361513 | 1.434176634 |
| 33       | 1.43378806                            | 1.4339381   | 1.434437476 | 1.435416765 | 1.436351454 |
| 34       | 1.43529125                            | 1.435663537 | 1.435981125 | 1.436413862 | 1.437717714 |
| 35       | 1.436732397                           | 1.436908191 | 1.437308821 | 1.438141954 | 1.439839375 |
| 36       | 1.438240949                           | 1.438243383 | 1.438253    | 1.438293291 | 1.438604067 |
| 37       | 1.439399402                           | 1.43994969  | 1.440550037 | 1.441373647 | 1.443079309 |
| 38       | 1.441178358                           | 1.441793397 | 1.442271352 | 1.442892493 | 1.444707301 |
| 39       | 1.443019092                           | 1.44324612  | 1.443648937 | 1.44437162  | 1.445888873 |
| 40       | 1.444388389                           | 1.444575838 | 1.444801527 | 1.445181107 | 1.446554022 |
| 41       | 1.445954343                           | 1.446525125 | 1.446913186 | 1.447395553 | 1.44885671  |
| 42       | 1.447598007                           | 1.447808813 | 1.448138693 | 1.448727087 | 1.450263455 |
| 43       | 1.449242244                           | 1.449706594 | 1.450094786 | 1.450604533 | 1.45197799  |
| 44       | 1.450627119                           | 1.450741874 | 1.45104387  | 1.451758051 | 1.453352575 |
| 45       | 1.452318446                           | 1.452507173 | 1.452728942 | 1.453102164 | 1.454538343 |
| 46       | 1.454165948                           | 1.454287591 | 1.454432734 | 1.454700944 | 1.456348872 |
| 47       | 1.454162365                           | 1.455352482 | 1.455948715 | 1.456125691 | 1.456165317 |
| 48       | 1.456721024                           | 1.456936464 | 1.457324263 | 1.458013763 | 1.45938742  |
| 49       | 1.458366202                           | 1.459031668 | 1.459387618 | 1.459790387 | 1.460963279 |
| 50       | 1.459419964                           | 1.46005247  | 1.460412408 | 1.460846364 | 1.462375321 |
| 51       | 1.460722647                           | 1.462120846 | 1.462593188 | 1.463073681 | 1.463789416 |
| 52       | 1.462740275                           | 1.462896596 | 1.463202736 | 1.463811653 | 1.465268446 |
| 53       | 1.464040221                           | 1.464476456 | 1.464740575 | 1.464939357 | 1.465105815 |
| 54       | 1.465341087                           | 1.466204957 | 1.466577911 | 1.466915211 | 1.46748118  |
| 55       | 1.467220286                           | 1.467449726 | 1.467975743 | 1.468367853 | 1.46847665  |
| 56       | 1.467884773                           | 1.468722575 | 1.469396524 | 1.469866047 | 1.470142959 |
| 57       | 1.470015175                           | 1.470379525 | 1.470676525 | 1.471017026 | 1.471622177 |
| 58       | 1.471628296                           | 1.472092356 | 1.472675975 | 1.473082894 | 1.47325326  |
| 59       | 1.472733203                           | 1.473352385 | 1.473677156 | 1.47405389  | 1.475311694 |
| 60       | 1.473585449                           | 1.474195143 | 1.474415488 | 1.47463612  | 1.475249852 |
| 61       | 1.473227223                           | 1.47545873  | 1.476222494 | 1.476648869 | 1.476934818 |
| 62       | 1.475202389                           | 1.47626336  | 1.4768074   | 1.477301111 | 1.478025505 |

Table-3-C6mim Tf2N

|    |             |             |             |             |             |
|----|-------------|-------------|-------------|-------------|-------------|
| 63 | 1.478319488 | 1.478930662 | 1.479161044 | 1.479422884 | 1.479950388 |
| 64 | 1.479226589 | 1.479473496 | 1.479960532 | 1.480899576 | 1.482912424 |
| 65 | 1.48128674  | 1.48153776  | 1.481780772 | 1.482076745 | 1.482582754 |
| 66 | 1.48323745  | 1.484003337 | 1.484694896 | 1.48506574  | 1.485198444 |
| 67 | 1.483314548 | 1.484254734 | 1.484585545 | 1.48490126  | 1.485649752 |
| 68 | 1.485762025 | 1.485872091 | 1.486304732 | 1.48681812  | 1.486986321 |
| 69 | 1.486648901 | 1.488150059 | 1.488630201 | 1.489073055 | 1.490079146 |
| 70 | 1.487207682 | 1.488005244 | 1.48838313  | 1.488664769 | 1.488938691 |

Table-4-C8mim Tf2N

TI – Tolerance Interval                       $Z_{oL}:Z_{oU}$   
 DI – Interval of Typical Data               $Z_L:Z_U$   
 LEL – Local Estimate of Location           $Z_o$

| Temp.[C] | [C8mim][Tf2N] [J/gK] |             |             |             |             |
|----------|----------------------|-------------|-------------|-------------|-------------|
|          | $Z_L$                | $Z_{oL}$    | $Z_o$       | $Z_{oU}$    | $Z_U$       |
| 20       | 1.471144569          | 1.472028419 | 1.472756069 | 1.473322711 | 1.473724979 |
| 21       | 1.473832105          | 1.474600116 | 1.475139875 | 1.475680766 | 1.477306939 |
| 22       | 1.475188917          | 1.475750094 | 1.476539055 | 1.47738759  | 1.478085098 |
| 23       | 1.476439892          | 1.477328402 | 1.47832512  | 1.479016455 | 1.479330826 |
| 24       | 1.478285551          | 1.478988178 | 1.479636215 | 1.480359714 | 1.481390623 |
| 25       | 1.480152495          | 1.480643269 | 1.481257248 | 1.481969645 | 1.482755477 |
| 26       | 1.48121588           | 1.481903307 | 1.482414073 | 1.482977978 | 1.483977827 |
| 27       | 1.483032836          | 1.483706361 | 1.484120128 | 1.484532781 | 1.485199319 |
| 28       | 1.484733999          | 1.485015302 | 1.485549126 | 1.486401294 | 1.487569726 |
| 29       | 1.486369623          | 1.486789104 | 1.487587004 | 1.488491526 | 1.489087522 |
| 30       | 1.488437364          | 1.488553456 | 1.48905141  | 1.489934606 | 1.490434129 |
| 31       | 1.489980728          | 1.490261313 | 1.490760532 | 1.491403658 | 1.491993143 |
| 32       | 1.491380147          | 1.491713947 | 1.492111736 | 1.492688016 | 1.493923124 |
| 33       | 1.492447656          | 1.493673955 | 1.494090696 | 1.494513361 | 1.495136683 |
| 34       | 1.494359469          | 1.494746491 | 1.495270862 | 1.495963183 | 1.496910427 |
| 35       | 1.49586601           | 1.496286028 | 1.496779705 | 1.497439925 | 1.498575636 |
| 36       | 1.497275636          | 1.49758535  | 1.497841405 | 1.498216126 | 1.499898256 |
| 37       | 1.498705518          | 1.499410005 | 1.499772338 | 1.500247677 | 1.501393324 |
| 38       | 1.500743482          | 1.501166975 | 1.501486706 | 1.501900814 | 1.503153764 |
| 39       | 1.502505971          | 1.502965958 | 1.503353237 | 1.503865754 | 1.505272011 |
| 40       | 1.503843944          | 1.504254941 | 1.504545329 | 1.504908327 | 1.505966525 |
| 41       | 1.505684084          | 1.505981461 | 1.506328196 | 1.506853922 | 1.508213956 |
| 42       | 1.50716803           | 1.507622486 | 1.508076083 | 1.508642651 | 1.509644117 |
| 43       | 1.509054188          | 1.509730763 | 1.510123105 | 1.510550962 | 1.51152645  |
| 44       | 1.510736171          | 1.510959959 | 1.511205461 | 1.511563766 | 1.512465977 |
| 45       | 1.512075968          | 1.512775509 | 1.513053244 | 1.513380122 | 1.514083384 |
| 46       | 1.513635142          | 1.514381543 | 1.514729413 | 1.515144095 | 1.515945544 |
| 47       | 1.513995559          | 1.514453247 | 1.514980116 | 1.515632907 | 1.516569467 |
| 48       | 1.516791328          | 1.517441063 | 1.517989188 | 1.518483212 | 1.518944981 |
| 49       | 1.51801216           | 1.518784672 | 1.519265089 | 1.519793103 | 1.520930892 |
| 50       | 1.519629914          | 1.520112034 | 1.520411192 | 1.52078285  | 1.522089296 |
| 51       | 1.521473339          | 1.522015335 | 1.522895024 | 1.523746428 | 1.524240794 |
| 52       | 1.523021245          | 1.523459419 | 1.523920614 | 1.524509064 | 1.525539346 |
| 53       | 1.524623336          | 1.52470017  | 1.525272174 | 1.526341461 | 1.52668221  |
| 54       | 1.526322394          | 1.526608848 | 1.527199033 | 1.527815723 | 1.528138407 |
| 55       | 1.527204006          | 1.528517706 | 1.529315111 | 1.529617533 | 1.529702112 |
| 56       | 1.528627919          | 1.529782311 | 1.530238906 | 1.530656485 | 1.531434235 |
| 57       | 1.530940429          | 1.530986172 | 1.531026    | 1.531077326 | 1.531203374 |
| 58       | 1.532771678          | 1.534053502 | 1.534329576 | 1.534507332 | 1.53469865  |
| 59       | 1.53390445           | 1.534797087 | 1.535087158 | 1.535339765 | 1.535809471 |
| 60       | 1.535112442          | 1.53595914  | 1.536285689 | 1.536581533 | 1.537127748 |
| 61       | 1.534461841          | 1.537206388 | 1.537817848 | 1.538220733 | 1.538670239 |
| 62       | 1.537184157          | 1.53779156  | 1.538317901 | 1.538947512 | 1.540125519 |

Table-4-C8mim Tf2N

|    |             |             |             |             |             |
|----|-------------|-------------|-------------|-------------|-------------|
| 63 | 1.539778698 | 1.540828908 | 1.541356923 | 1.541662537 | 1.541840494 |
| 64 | 1.540736105 | 1.541012608 | 1.541600873 | 1.542506073 | 1.543474647 |
| 65 | 1.544079653 | 1.54410584  | 1.544154004 | 1.544258812 | 1.544658872 |
| 66 | 1.544410525 | 1.545145882 | 1.545549096 | 1.545983487 | 1.546997118 |
| 67 | 1.54578835  | 1.545894183 | 1.546032098 | 1.546284542 | 1.54739586  |
| 68 | 1.547570389 | 1.548450129 | 1.548720929 | 1.54894101  | 1.54928833  |
| 69 | 1.548205325 | 1.549479959 | 1.550012135 | 1.550401208 | 1.550795384 |
| 70 | 1.549230243 | 1.551322641 | 1.551748771 | 1.551951296 | 1.552078254 |

Table-4-C8mim Tf2N

TI – Tolerance Interval  $Z_{OL}:Z_{OU}$   
 DI – Interval of Typical Data  $Z_L:Z_U$   
 LEL – Local Estimate of Location  $Z_0$

| Temp.[C] | [C8mim][Tf2N] + MWCNT (1% wt.) [J/gK] |             |             |             |             |
|----------|---------------------------------------|-------------|-------------|-------------|-------------|
|          | $Z_L$                                 | $Z_{OL}$    | $Z_0$       | $Z_{OU}$    | $Z_U$       |
| 20       | 1.459989056                           | 1.460940967 | 1.461464991 | 1.461797666 | 1.462012987 |
| 21       | 1.462322413                           | 1.462973263 | 1.463519308 | 1.464059441 | 1.464686529 |
| 22       | 1.46388118                            | 1.464199212 | 1.464965222 | 1.465759376 | 1.466109057 |
| 23       | 1.465155122                           | 1.466079299 | 1.466566896 | 1.467005848 | 1.468199057 |
| 24       | 1.467115327                           | 1.467606538 | 1.468334806 | 1.468944884 | 1.469244835 |
| 25       | 1.468614042                           | 1.46901987  | 1.470159744 | 1.470842328 | 1.470959267 |
| 26       | 1.46976644                            | 1.470412254 | 1.470979298 | 1.47160554  | 1.472522526 |
| 27       | 1.471884399                           | 1.472543083 | 1.47286007  | 1.473130059 | 1.473788828 |
| 28       | 1.473248288                           | 1.473495147 | 1.474030376 | 1.474718067 | 1.475214054 |
| 29       | 1.47478133                            | 1.475279186 | 1.475775141 | 1.476345875 | 1.477151129 |
| 30       | 1.476104518                           | 1.477207179 | 1.477615557 | 1.478075768 | 1.478977096 |
| 31       | 1.477806535                           | 1.47914093  | 1.479561602 | 1.479952813 | 1.480419225 |
| 32       | 1.479890552                           | 1.480275788 | 1.480787073 | 1.481374779 | 1.481967869 |
| 33       | 1.48117819                            | 1.481513519 | 1.48248397  | 1.483211727 | 1.4833766   |
| 34       | 1.483168788                           | 1.48355016  | 1.484058699 | 1.484589466 | 1.485023203 |
| 35       | 1.483856308                           | 1.485197386 | 1.485640778 | 1.486079857 | 1.486690264 |
| 36       | 1.486050797                           | 1.486160148 | 1.486215    | 1.486269224 | 1.486373223 |
| 37       | 1.487291167                           | 1.487470398 | 1.488031442 | 1.489158794 | 1.490397784 |
| 38       | 1.489165499                           | 1.489564672 | 1.489978943 | 1.490560201 | 1.491961665 |
| 39       | 1.491108309                           | 1.491550863 | 1.491890088 | 1.492304411 | 1.493283127 |
| 40       | 1.492757002                           | 1.492848314 | 1.493057204 | 1.493519915 | 1.494651745 |
| 41       | 1.494313904                           | 1.494915318 | 1.495221154 | 1.495557494 | 1.496488248 |
| 42       | 1.495833608                           | 1.496093273 | 1.49656798  | 1.497313438 | 1.498350488 |
| 43       | 1.497546788                           | 1.498201739 | 1.498593795 | 1.499048805 | 1.500307295 |
| 44       | 1.499374813                           | 1.499544556 | 1.499898954 | 1.500480705 | 1.501221878 |
| 45       | 1.50063394                            | 1.501386236 | 1.501687917 | 1.502044566 | 1.502815648 |
| 46       | 1.502419055                           | 1.502812098 | 1.503262549 | 1.503863656 | 1.504928708 |
| 47       | 1.502755697                           | 1.503359329 | 1.503704424 | 1.504056733 | 1.504713148 |
| 48       | 1.505048912                           | 1.505917399 | 1.506238805 | 1.506600662 | 1.507307814 |
| 49       | 1.507096079                           | 1.507304885 | 1.507600412 | 1.508108362 | 1.509530204 |
| 50       | 1.508189786                           | 1.508710394 | 1.509065321 | 1.509523913 | 1.51116665  |
| 51       | 1.510235667                           | 1.510627101 | 1.511547371 | 1.512579895 | 1.513112284 |
| 52       | 1.511543212                           | 1.511985712 | 1.512565619 | 1.513289844 | 1.514190182 |
| 53       | 1.513347942                           | 1.513554148 | 1.514302547 | 1.515088205 | 1.515320767 |
| 54       | 1.514938582                           | 1.51537627  | 1.51581242  | 1.516392659 | 1.517641337 |
| 55       | 1.516442351                           | 1.517017361 | 1.517521147 | 1.518114509 | 1.519159297 |
| 56       | 1.517374172                           | 1.518372941 | 1.519078188 | 1.519719764 | 1.520437143 |
| 57       | 1.519580467                           | 1.519708322 | 1.519751    | 1.51977705  | 1.519797143 |
| 58       | 1.521660075                           | 1.522861843 | 1.523176942 | 1.523396325 | 1.523653782 |
| 59       | 1.522538879                           | 1.523622936 | 1.523985585 | 1.524280162 | 1.524720922 |
| 60       | 1.524010317                           | 1.524741076 | 1.525085416 | 1.525440175 | 1.526275759 |
| 61       | 1.523251984                           | 1.52587756  | 1.526607811 | 1.527196549 | 1.528162225 |
| 62       | 1.526051232                           | 1.526119262 | 1.526403972 | 1.527253489 | 1.528667345 |

Table-4-C8mim Tf2N

|    |             |             |             |             |             |
|----|-------------|-------------|-------------|-------------|-------------|
| 63 | 1.528566948 | 1.529650174 | 1.53024441  | 1.530584507 | 1.530769234 |
| 64 | 1.529228875 | 1.529915091 | 1.530543724 | 1.531172851 | 1.531860865 |
| 65 | 1.53256302  | 1.532639779 | 1.532748272 | 1.532925714 | 1.533346102 |
| 66 | 1.533609653 | 1.53390896  | 1.534093497 | 1.534323634 | 1.535156547 |
| 67 | 1.534471192 | 1.534729243 | 1.534961397 | 1.535292596 | 1.536388322 |
| 68 | 1.536208957 | 1.53707958  | 1.537374463 | 1.537632551 | 1.538105667 |
| 69 | 1.53742817  | 1.538244826 | 1.538744387 | 1.539173794 | 1.539648967 |
| 70 | 1.537689355 | 1.539655389 | 1.540126818 | 1.540455613 | 1.540859201 |



Table-5-C10mim Tf2N

TI – Tolerance Interval                     $Z_{OL}:Z_{OU}$   
 DI – Interval of Typical Data            $Z_L:Z_U$   
 LEL – Local Estimate of Location        $Z_0$

| Temp.[C] | [C10mim][Tf2N] [J/gK] |          |          |          |          |  |
|----------|-----------------------|----------|----------|----------|----------|--|
|          | $Z_L$                 | $Z_{OL}$ | $Z_0$    | $Z_{OU}$ | $Z_U$    |  |
| 20       | 1.491273              | 1.491327 | 1.491405 | 1.491624 | 1.492045 |  |
| 21       | 1.498665              | 1.499016 | 1.499195 | 1.499405 | 1.49957  |  |
| 22       | 1.501429              | 1.501462 | 1.501476 | 1.50149  | 1.501551 |  |
| 23       | 1.502971              | 1.502972 | 1.502978 | 1.50303  | 1.50337  |  |
| 24       | 1.504077              | 1.504272 | 1.504477 | 1.504915 | 1.505565 |  |
| 25       | 1.506226              | 1.506268 | 1.506338 | 1.506562 | 1.507058 |  |
| 26       | 1.507435              | 1.507455 | 1.507497 | 1.507679 | 1.508222 |  |
| 27       | 1.509116              | 1.509207 | 1.50933  | 1.509654 | 1.510242 |  |
| 28       | 1.509478              | 1.510223 | 1.510623 | 1.511139 | 1.511619 |  |
| 29       | 1.510968              | 1.511637 | 1.512023 | 1.512558 | 1.513121 |  |
| 30       | 1.512991              | 1.513423 | 1.513725 | 1.514195 | 1.514736 |  |
| 31       | 1.514391              | 1.514954 | 1.515251 | 1.515647 | 1.516115 |  |
| 32       | 1.516259              | 1.516309 | 1.516391 | 1.51666  | 1.517261 |  |
| 33       | 1.517377              | 1.5177   | 1.517932 | 1.518302 | 1.518733 |  |
| 34       | 1.518613              | 1.518893 | 1.519145 | 1.519616 | 1.520242 |  |
| 35       | 1.520424              | 1.520594 | 1.520784 | 1.521209 | 1.521869 |  |
| 36       | 1.522127              | 1.522349 | 1.522549 | 1.522923 | 1.523421 |  |
| 37       | 1.523822              | 1.523829 | 1.523848 | 1.52395  | 1.524354 |  |
| 38       | 1.525356              | 1.525368 | 1.525395 | 1.525535 | 1.526037 |  |
| 39       | 1.526403              | 1.5266   | 1.526795 | 1.527188 | 1.527745 |  |
| 40       | 1.527933              | 1.528048 | 1.528199 | 1.528593 | 1.529298 |  |
| 41       | 1.529567              | 1.529874 | 1.530114 | 1.530514 | 1.531002 |  |
| 42       | 1.530598              | 1.531465 | 1.531669 | 1.531894 | 1.532739 |  |
| 43       | 1.531587              | 1.532599 | 1.53313  | 1.533789 | 1.534362 |  |
| 44       | 1.533906              | 1.534033 | 1.5342   | 1.534631 | 1.535397 |  |
| 45       | 1.535394              | 1.535594 | 1.535822 | 1.536344 | 1.537169 |  |
| 46       | 1.536779              | 1.537215 | 1.537519 | 1.537992 | 1.538536 |  |
| 47       | 1.538671              | 1.538732 | 1.538815 | 1.53904  | 1.539456 |  |
| 48       | 1.540217              | 1.540434 | 1.540609 | 1.54091  | 1.541285 |  |
| 49       | 1.541263              | 1.541832 | 1.542142 | 1.542548 | 1.54294  |  |
| 50       | 1.543205              | 1.543433 | 1.543631 | 1.54399  | 1.544457 |  |
| 51       | 1.544902              | 1.544905 | 1.544916 | 1.544977 | 1.545256 |  |
| 52       | 1.54545               | 1.54637  | 1.546819 | 1.54731  | 1.547646 |  |
| 53       | 1.546816              | 1.547348 | 1.547666 | 1.548118 | 1.548601 |  |
| 54       | 1.54869               | 1.549181 | 1.549441 | 1.549772 | 1.55007  |  |
| 55       | 1.550862              | 1.551142 | 1.551283 | 1.551449 | 1.551578 |  |
| 56       | 1.552029              | 1.552057 | 1.552107 | 1.552287 | 1.552729 |  |
| 57       | 1.553052              | 1.553498 | 1.553773 | 1.554169 | 1.554597 |  |
| 58       | 1.555124              | 1.55523  | 1.555338 | 1.555564 | 1.555892 |  |
| 59       | 1.556249              | 1.557255 | 1.55773  | 1.558215 | 1.558507 |  |
| 60       | 1.558205              | 1.558311 | 1.558429 | 1.558695 | 1.559108 |  |
| 61       | 1.559459              | 1.559572 | 1.559711 | 1.560052 | 1.560628 |  |
| 62       | 1.561407              | 1.561462 | 1.561536 | 1.561734 | 1.562097 |  |

Table-5-C10mim Tf2N

|    |          |          |          |          |          |
|----|----------|----------|----------|----------|----------|
| 63 | 1.562938 | 1.562939 | 1.562942 | 1.56298  | 1.563296 |
| 64 | 1.563665 | 1.56453  | 1.564927 | 1.565304 | 1.565502 |
| 65 | 1.564913 | 1.565486 | 1.565793 | 1.566189 | 1.566557 |
| 66 | 1.567378 | 1.567415 | 1.567473 | 1.567652 | 1.568031 |
| 67 | 1.567582 | 1.568304 | 1.568655 | 1.569037 | 1.569293 |
| 68 | 1.569304 | 1.569995 | 1.570354 | 1.570792 | 1.571159 |
| 69 | 1.571467 | 1.571586 | 1.571724 | 1.572045 | 1.572561 |
| 70 | 1.572657 | 1.572891 | 1.573068 | 1.573358 | 1.573705 |

**after purification of the sample and Ion Chromatography analysis**

Table-5-C10mim Tf2N

TI – Tolerance Interval  $Z_{OL}:Z_{OU}$   
 DI – Interval of Typical Data  $Z_L:Z_U$   
 LEL – Local Estimate of Location  $Z_0$

| Temp.[C] | [C10mim][Tf2N] + MWCNT (1% wt.) [J/gK] |          |          |          |          |
|----------|----------------------------------------|----------|----------|----------|----------|
|          | $Z_L$                                  | $Z_{OL}$ | $Z_0$    | $Z_{OU}$ | $Z_U$    |
| 21       | 1.498051                               | 1.498692 | 1.499128 | 1.499674 | 1.501392 |
| 22       | 1.500229                               | 1.500952 | 1.501304 | 1.501642 | 1.50225  |
| 23       | 1.501314                               | 1.502112 | 1.502486 | 1.502875 | 1.503829 |
| 24       | 1.503195                               | 1.504121 | 1.504506 | 1.504854 | 1.505451 |
| 25       | 1.504634                               | 1.50562  | 1.506113 | 1.506588 | 1.507429 |
| 26       | 1.506272                               | 1.506945 | 1.507339 | 1.507779 | 1.508879 |
| 27       | 1.508027                               | 1.508709 | 1.509199 | 1.509725 | 1.510613 |
| 28       | 1.509123                               | 1.50975  | 1.510126 | 1.510585 | 1.512152 |
| 29       | 1.510235                               | 1.51119  | 1.511687 | 1.512242 | 1.51383  |
| 30       | 1.512011                               | 1.512897 | 1.513387 | 1.51393  | 1.515325 |
| 31       | 1.513678                               | 1.513895 | 1.514076 | 1.514342 | 1.515496 |
| 32       | 1.515084                               | 1.516194 | 1.516716 | 1.517297 | 1.519164 |
| 33       | 1.51687                                | 1.517343 | 1.517725 | 1.518226 | 1.519665 |
| 34       | 1.518487                               | 1.519291 | 1.519815 | 1.520443 | 1.522164 |
| 35       | 1.520467                               | 1.521315 | 1.522025 | 1.522876 | 1.524558 |
| 36       | 1.522416                               | 1.522702 | 1.522911 | 1.523184 | 1.524084 |
| 37       | 1.523492                               | 1.524504 | 1.524987 | 1.525529 | 1.527294 |
| 38       | 1.525108                               | 1.525373 | 1.525883 | 1.526843 | 1.528832 |
| 39       | 1.526763                               | 1.526858 | 1.52713  | 1.527872 | 1.530072 |
| 40       | 1.528204                               | 1.529089 | 1.52956  | 1.530097 | 1.531732 |
| 41       | 1.530352                               | 1.53065  | 1.53098  | 1.531507 | 1.533356 |
| 42       | 1.531605                               | 1.531836 | 1.532214 | 1.532936 | 1.535142 |
| 43       | 1.532668                               | 1.532975 | 1.533461 | 1.534343 | 1.536752 |
| 44       | 1.534699                               | 1.536018 | 1.536523 | 1.536837 | 1.537077 |
| 45       | 1.536385                               | 1.537636 | 1.538119 | 1.538526 | 1.539136 |
| 46       | 1.537825                               | 1.538033 | 1.538406 | 1.539033 | 1.540101 |
| 47       | 1.5394                                 | 1.540331 | 1.540647 | 1.540951 | 1.541703 |
| 48       | 1.541013                               | 1.541822 | 1.542121 | 1.542369 | 1.542745 |
| 49       | 1.542193                               | 1.543746 | 1.544115 | 1.544211 | 1.544234 |
| 50       | 1.544183                               | 1.544471 | 1.544746 | 1.545095 | 1.545786 |
| 51       | 1.545387                               | 1.545794 | 1.546033 | 1.546312 | 1.547118 |
| 52       | 1.547066                               | 1.547742 | 1.547924 | 1.547997 | 1.54803  |
| 53       | 1.548389                               | 1.549402 | 1.549648 | 1.549831 | 1.550093 |
| 54       | 1.54974                                | 1.550759 | 1.5511   | 1.551336 | 1.551578 |
| 55       | 1.551652                               | 1.552095 | 1.55229  | 1.552447 | 1.552643 |
| 56       | 1.552389                               | 1.55291  | 1.55312  | 1.55333  | 1.553857 |
| 57       | 1.554151                               | 1.554867 | 1.555149 | 1.555382 | 1.555702 |
| 58       | 1.55571                                | 1.556133 | 1.556312 | 1.556483 | 1.55682  |
| 59       | 1.557155                               | 1.55776  | 1.557934 | 1.558069 | 1.558264 |
| 60       | 1.558856                               | 1.559199 | 1.559602 | 1.559931 | 1.56012  |
| 61       | 1.56054                                | 1.560568 | 1.560608 | 1.560676 | 1.560842 |
| 62       | 1.561825                               | 1.561897 | 1.562027 | 1.562229 | 1.563046 |

Table-5-C10mim Tf2N

|    |          |          |          |          |          |
|----|----------|----------|----------|----------|----------|
| 63 | 1.56324  | 1.563267 | 1.563385 | 1.563809 | 1.564819 |
| 64 | 1.564673 | 1.565022 | 1.565193 | 1.565363 | 1.565709 |
| 65 | 1.565783 | 1.565897 | 1.566417 | 1.566913 | 1.567015 |
| 66 | 1.56768  | 1.567885 | 1.567989 | 1.568074 | 1.568174 |
| 67 | 1.568813 | 1.56909  | 1.569385 | 1.569763 | 1.570419 |
| 68 | 1.570586 | 1.570678 | 1.570846 | 1.571187 | 1.572176 |
| 69 | 1.572109 | 1.572145 | 1.572238 | 1.572447 | 1.572856 |
| 70 | 1.572819 | 1.573361 | 1.573606 | 1.573865 | 1.574567 |

Table-5-C10mim Tf2N

TI – Tolerance Interval  $Z_{OL}:Z_{OU}$   
 DI – Interval of Typical Data  $Z_L:Z_U$   
 LEL – Local Estimate of Location  $Z_0$

| Temp.[C] | [C10mim][Tf2N] [J/gK] |          |          |          |          |
|----------|-----------------------|----------|----------|----------|----------|
|          | $Z_L$                 | $Z_{OL}$ | $Z_0$    | $Z_{OU}$ | $Z_U$    |
| 21       | 1.498665              | 1.499016 | 1.499195 | 1.499405 | 1.49957  |
| 22       | 1.501429              | 1.501462 | 1.501476 | 1.50149  | 1.501551 |
| 23       | 1.502971              | 1.502972 | 1.502978 | 1.50303  | 1.50337  |
| 24       | 1.504077              | 1.504272 | 1.504477 | 1.504915 | 1.505565 |
| 25       | 1.506226              | 1.506268 | 1.506338 | 1.506562 | 1.507058 |
| 26       | 1.507435              | 1.507455 | 1.507497 | 1.507679 | 1.508222 |
| 27       | 1.509116              | 1.509207 | 1.50933  | 1.509654 | 1.510242 |
| 28       | 1.509478              | 1.510223 | 1.510623 | 1.511139 | 1.511619 |
| 29       | 1.510968              | 1.511637 | 1.512023 | 1.512558 | 1.513121 |
| 30       | 1.512991              | 1.513423 | 1.513725 | 1.514195 | 1.514736 |
| 31       | 1.514391              | 1.514954 | 1.515251 | 1.515647 | 1.516115 |
| 32       | 1.516259              | 1.516309 | 1.516391 | 1.51666  | 1.517261 |
| 33       | 1.517377              | 1.5177   | 1.517932 | 1.518302 | 1.518733 |
| 34       | 1.518613              | 1.518893 | 1.519145 | 1.519616 | 1.520242 |
| 35       | 1.520424              | 1.520594 | 1.520784 | 1.521209 | 1.521869 |
| 36       | 1.522127              | 1.522349 | 1.522549 | 1.522923 | 1.523421 |
| 37       | 1.523822              | 1.523829 | 1.523848 | 1.52395  | 1.524354 |
| 38       | 1.525356              | 1.525368 | 1.525395 | 1.525535 | 1.526037 |
| 39       | 1.526403              | 1.5266   | 1.526795 | 1.527188 | 1.527745 |
| 40       | 1.527933              | 1.528048 | 1.528199 | 1.528593 | 1.529298 |
| 41       | 1.529567              | 1.529874 | 1.530114 | 1.530514 | 1.531002 |
| 42       | 1.530598              | 1.531465 | 1.531669 | 1.531894 | 1.532739 |
| 43       | 1.531587              | 1.532599 | 1.53313  | 1.533789 | 1.534362 |
| 44       | 1.533906              | 1.534033 | 1.5342   | 1.534631 | 1.535397 |
| 45       | 1.535394              | 1.535594 | 1.535822 | 1.536344 | 1.537169 |
| 46       | 1.536779              | 1.537215 | 1.537519 | 1.537992 | 1.538536 |
| 47       | 1.538671              | 1.538732 | 1.538815 | 1.53904  | 1.539456 |
| 48       | 1.540217              | 1.540434 | 1.540609 | 1.54091  | 1.541285 |
| 49       | 1.541263              | 1.541832 | 1.542142 | 1.542548 | 1.54294  |
| 50       | 1.543205              | 1.543433 | 1.543631 | 1.54399  | 1.544457 |
| 51       | 1.544902              | 1.544905 | 1.544916 | 1.544977 | 1.545256 |
| 52       | 1.54545               | 1.54637  | 1.546819 | 1.54731  | 1.547646 |
| 53       | 1.546816              | 1.547348 | 1.547666 | 1.548118 | 1.548601 |
| 54       | 1.54869               | 1.549181 | 1.549441 | 1.549772 | 1.55007  |
| 55       | 1.550862              | 1.551142 | 1.551283 | 1.551449 | 1.551578 |
| 56       | 1.552029              | 1.552057 | 1.552107 | 1.552287 | 1.552729 |
| 57       | 1.553052              | 1.553498 | 1.553773 | 1.554169 | 1.554597 |
| 58       | 1.555124              | 1.55523  | 1.555338 | 1.555564 | 1.555892 |
| 59       | 1.556249              | 1.557255 | 1.55773  | 1.558215 | 1.558507 |
| 60       | 1.558205              | 1.558311 | 1.558429 | 1.558695 | 1.559108 |
| 61       | 1.559459              | 1.559572 | 1.559711 | 1.560052 | 1.560628 |
| 62       | 1.561407              | 1.561462 | 1.561536 | 1.561734 | 1.562097 |

Table-5-C10mim Tf2N

|    |          |          |          |          |          |
|----|----------|----------|----------|----------|----------|
| 63 | 1.562938 | 1.562939 | 1.562942 | 1.56298  | 1.563296 |
| 64 | 1.563665 | 1.56453  | 1.564927 | 1.565304 | 1.565502 |
| 65 | 1.564913 | 1.565486 | 1.565793 | 1.566189 | 1.566557 |
| 66 | 1.567378 | 1.567415 | 1.567473 | 1.567652 | 1.568031 |
| 67 | 1.567582 | 1.568304 | 1.568655 | 1.569037 | 1.569293 |
| 68 | 1.569304 | 1.569995 | 1.570354 | 1.570792 | 1.571159 |
| 69 | 1.571467 | 1.571586 | 1.571724 | 1.572045 | 1.572561 |
| 70 | 1.572657 | 1.572891 | 1.573068 | 1.573358 | 1.573705 |

**before purification of the sample and Ion Chromatography analysis**

Table-5-C10mim Tf2N

TI – Tolerance Interval  $Z_{0L}:Z_{0U}$   
 DI – Interval of Typical Data  $Z_L:Z_U$   
 LEL – Local Estimate of Location  $Z_0$

| Temp.[C] | [C10mim][Tf2N] + MWCNT (1% wt.) [J/gK] |             |             |             |             |
|----------|----------------------------------------|-------------|-------------|-------------|-------------|
|          | ZL                                     | Z0L         | Z0          | Z0U         | ZU          |
| 21       | 1.518072494                            | 1.518723004 | 1.519851245 | 1.520616441 | 1.520852115 |
| 22       | 1.519568452                            | 1.522089083 | 1.522806287 | 1.523378978 | 1.523863223 |
| 23       | 1.52257134                             | 1.5229068   | 1.523714965 | 1.524892972 | 1.525849777 |
| 24       | 1.523847955                            | 1.524229176 | 1.524960059 | 1.526101715 | 1.527564478 |
| 25       | 1.525609498                            | 1.525937175 | 1.526637315 | 1.527874906 | 1.529698025 |
| 26       | 1.526334109                            | 1.52818608  | 1.528831756 | 1.529510049 | 1.53060916  |
| 27       | 1.528927057                            | 1.529154927 | 1.529557517 | 1.530333809 | 1.532401564 |
| 28       | 1.530663084                            | 1.53094653  | 1.531454668 | 1.532304027 | 1.533736119 |
| 29       | 1.532125333                            | 1.532838791 | 1.533292987 | 1.533842559 | 1.53549078  |
| 30       | 1.534027502                            | 1.534114439 | 1.534499804 | 1.535771602 | 1.538212838 |
| 31       | 1.535631898                            | 1.535739208 | 1.536093633 | 1.537101037 | 1.539495714 |
| 32       | 1.537716363                            | 1.53783072  | 1.538132516 | 1.538920217 | 1.541325347 |
| 33       | 1.539106881                            | 1.539520099 | 1.539901122 | 1.540482848 | 1.542996302 |
| 34       | 1.540593599                            | 1.541045979 | 1.541430752 | 1.54199841  | 1.544485882 |
| 35       | 1.542361233                            | 1.542670868 | 1.542812    | 1.542937243 | 1.54312514  |
| 36       | 1.543770795                            | 1.544221266 | 1.544625784 | 1.54524904  | 1.548272932 |
| 37       | 1.544709021                            | 1.545331471 | 1.545838551 | 1.546577606 | 1.549938225 |
| 38       | 1.546399244                            | 1.547035625 | 1.547582863 | 1.548392357 | 1.551897756 |
| 39       | 1.548880262                            | 1.548911465 | 1.548953    | 1.549022272 | 1.549233019 |
| 40       | 1.550576087                            | 1.550689081 | 1.550732    | 1.550762404 | 1.550792028 |
| 41       | 1.552212559                            | 1.552394988 | 1.552632646 | 1.553106103 | 1.556614558 |
| 42       | 1.55400146                             | 1.554210753 | 1.554494437 | 1.555067165 | 1.559030853 |
| 43       | 1.555582791                            | 1.555661816 | 1.555747    | 1.555871056 | 1.556208062 |
| 44       | 1.557319285                            | 1.55770633  | 1.558150036 | 1.5589265   | 1.562828414 |
| 45       | 1.558997028                            | 1.559004923 | 1.559076847 | 1.559749535 | 1.564645568 |
| 46       | 1.560624549                            | 1.560714956 | 1.560913691 | 1.561468362 | 1.565087678 |
| 47       | 1.562400294                            | 1.562465971 | 1.562552    | 1.562693931 | 1.563121779 |
| 48       | 1.562505662                            | 1.563584396 | 1.564167637 | 1.56482976  | 1.566756117 |
| 49       | 1.565106557                            | 1.565269383 | 1.565621519 | 1.566503471 | 1.570445248 |
| 50       | 1.566825769                            | 1.567268202 | 1.56774473  | 1.568546849 | 1.572435086 |
| 51       | 1.567752794                            | 1.568367856 | 1.568921385 | 1.569777152 | 1.57398618  |
| 52       | 1.570432012                            | 1.570574777 | 1.570935175 | 1.571908282 | 1.575720433 |
| 53       | 1.571446668                            | 1.571579282 | 1.571878881 | 1.57266802  | 1.576568906 |
| 54       | 1.573359951                            | 1.573654787 | 1.574063491 | 1.574798093 | 1.577342038 |
| 55       | 1.575128733                            | 1.575592596 | 1.576008876 | 1.576636069 | 1.579336932 |
| 56       | 1.576708442                            | 1.576999733 | 1.577488132 | 1.578417141 | 1.581050155 |
| 57       | 1.57788488                             | 1.57849027  | 1.578987025 | 1.579687818 | 1.582343286 |
| 58       | 1.57946188                             | 1.579693506 | 1.579827    | 1.579967896 | 1.580259779 |
| 59       | 1.582315557                            | 1.582860363 | 1.583235463 | 1.583731895 | 1.5856937   |
| 60       | 1.582963903                            | 1.58352104  | 1.583947166 | 1.584533182 | 1.58680207  |
| 61       | 1.584435946                            | 1.584796281 | 1.585188114 | 1.585814    | 1.588093467 |
| 62       | 1.583419202                            | 1.586195065 | 1.587101755 | 1.587939387 | 1.589821418 |

Table-5-C10mim Tf2N

|    |             |             |             |             |             |
|----|-------------|-------------|-------------|-------------|-------------|
| 63 | 1.586139027 | 1.586642895 | 1.587169049 | 1.587949337 | 1.590219324 |
| 64 | 1.589657871 | 1.589848709 | 1.590368849 | 1.591241357 | 1.592041898 |
| 65 | 1.590060825 | 1.59115397  | 1.591644915 | 1.592133936 | 1.593208074 |
| 66 | 1.593586833 | 1.593601988 | 1.593628119 | 1.593688085 | 1.5940573   |
| 67 | 1.594458759 | 1.594657619 | 1.594829898 | 1.595065074 | 1.595759472 |
| 68 | 1.595196357 | 1.59588909  | 1.59612602  | 1.596350861 | 1.596886057 |
| 69 | 1.597420048 | 1.598128791 | 1.598286256 | 1.598383959 | 1.598480195 |
| 70 | 1.598103259 | 1.599546115 | 1.599998092 | 1.600361292 | 1.600911365 |



Table-6-C12mim Tf2N

TI – Tolerance Interval  $Z_{oL}:Z_{oU}$   
 DI – Interval of Typical Data  $Z_L:Z_U$   
 LEL – Local Estimate of Location  $Z_o$

| Temp.[C] | [C12mim][Tf2N] [J/gK] |             |             |             |             |
|----------|-----------------------|-------------|-------------|-------------|-------------|
|          | $Z_L$                 | $Z_{oL}$    | $Z_o$       | $Z_{oU}$    | $Z_U$       |
| 20       | 1.544680955           | 1.545171875 | 1.545380017 | 1.545598114 | 1.546214357 |
| 21       | 1.546913332           | 1.547272898 | 1.5475016   | 1.547780095 | 1.548639463 |
| 22       | 1.548295347           | 1.548952968 | 1.549209646 | 1.54946572  | 1.550115908 |
| 23       | 1.549560399           | 1.550391444 | 1.550707209 | 1.55099977  | 1.551586583 |
| 24       | 1.55120648            | 1.551881139 | 1.552295718 | 1.552665419 | 1.553110146 |
| 25       | 1.553072426           | 1.55329486  | 1.553624543 | 1.554071839 | 1.554653306 |
| 26       | 1.553922019           | 1.554908764 | 1.555223832 | 1.555522002 | 1.555893307 |
| 27       | 1.556442013           | 1.556564827 | 1.556650725 | 1.556756809 | 1.55705597  |
| 28       | 1.557854147           | 1.558340578 | 1.558504927 | 1.558610025 | 1.558701293 |
| 29       | 1.55940717            | 1.559729069 | 1.559965452 | 1.560206116 | 1.560938684 |
| 30       | 1.56119045            | 1.561484764 | 1.56186015  | 1.562038272 | 1.562080412 |
| 31       | 1.563086571           | 1.563404657 | 1.563536462 | 1.563653899 | 1.563848921 |
| 32       | 1.564495851           | 1.564910717 | 1.565153887 | 1.565315843 | 1.565425615 |
| 33       | 1.565708952           | 1.566381154 | 1.567038304 | 1.567358466 | 1.567453058 |
| 34       | 1.567612392           | 1.56797612  | 1.568332973 | 1.568741659 | 1.570077076 |
| 35       | 1.569078573           | 1.569599943 | 1.569957512 | 1.57034786  | 1.571081672 |
| 36       | 1.570203149           | 1.570615071 | 1.570887    | 1.571241243 | 1.57264402  |
| 37       | 1.571793151           | 1.57227787  | 1.572627448 | 1.573062954 | 1.574275202 |
| 38       | 1.57404008            | 1.574099551 | 1.57422998  | 1.574561697 | 1.576086309 |
| 39       | 1.575785701           | 1.576027382 | 1.576220005 | 1.5764917   | 1.577585711 |
| 40       | 1.577402781           | 1.577495495 | 1.577602279 | 1.577783706 | 1.578552891 |
| 41       | 1.579092762           | 1.579436135 | 1.579704699 | 1.580051422 | 1.581027407 |
| 42       | 1.580853299           | 1.580937364 | 1.581111071 | 1.581483987 | 1.582508454 |
| 43       | 1.582553605           | 1.583038375 | 1.583333991 | 1.583687937 | 1.58477217  |
| 44       | 1.584377192           | 1.584398114 | 1.584538652 | 1.585192616 | 1.586329621 |
| 45       | 1.585971892           | 1.586291427 | 1.586638124 | 1.587083595 | 1.587847191 |
| 46       | 1.587574836           | 1.587834795 | 1.588256153 | 1.58893141  | 1.590123911 |
| 47       | 1.588248386           | 1.588635789 | 1.589071261 | 1.589617067 | 1.590449756 |
| 48       | 1.590933093           | 1.591138311 | 1.591484869 | 1.592063365 | 1.59313521  |
| 49       | 1.592598999           | 1.592900908 | 1.593381728 | 1.594069722 | 1.59499497  |
| 50       | 1.593969483           | 1.594558926 | 1.594884721 | 1.595263591 | 1.596447994 |
| 51       | 1.59579613            | 1.596553109 | 1.597093521 | 1.597524015 | 1.598132836 |
| 52       | 1.597456535           | 1.59777757  | 1.59842773  | 1.599106766 | 1.599468088 |
| 53       | 1.599030379           | 1.599475328 | 1.600035564 | 1.600366369 | 1.60047378  |
| 54       | 1.600760604           | 1.600840286 | 1.601279541 | 1.602084631 | 1.602438581 |
| 55       | 1.601855333           | 1.602352872 | 1.60292228  | 1.603490282 | 1.603984023 |
| 56       | 1.603212669           | 1.604086419 | 1.604547957 | 1.604936725 | 1.60539768  |
| 57       | 1.605188213           | 1.605404575 | 1.605589121 | 1.605866144 | 1.607191008 |
| 58       | 1.607594773           | 1.60840234  | 1.608670359 | 1.608911802 | 1.609403845 |
| 59       | 1.608849021           | 1.60940621  | 1.609626393 | 1.609855137 | 1.610530144 |
| 60       | 1.61027658            | 1.610462704 | 1.610653856 | 1.610958198 | 1.612208271 |
| 61       | 1.609265481           | 1.611800969 | 1.61253551  | 1.613151169 | 1.61425266  |
| 62       | 1.611899111           | 1.612569191 | 1.613007387 | 1.613636366 | 1.615162622 |

Table-6-C12mim Tf2N

|    |             |             |             |             |             |
|----|-------------|-------------|-------------|-------------|-------------|
| 63 | 1.615140333 | 1.615643408 | 1.616607919 | 1.617178466 | 1.617311502 |
| 64 | 1.615825184 | 1.615930759 | 1.616267213 | 1.617304081 | 1.620836595 |
| 65 | 1.618993576 | 1.619157537 | 1.61929538  | 1.619497269 | 1.620372307 |
| 66 | 1.619920017 | 1.620191531 | 1.620449671 | 1.620857084 | 1.6228028   |
| 67 | 1.621246326 | 1.621287682 | 1.621358    | 1.621529569 | 1.623392244 |
| 68 | 1.623362537 | 1.624152006 | 1.624442986 | 1.624737869 | 1.625582722 |
| 69 | 1.624336802 | 1.625601667 | 1.626126758 | 1.626600214 | 1.627412887 |
| 70 | 1.625023926 | 1.626884612 | 1.627405705 | 1.627794447 | 1.628313455 |

Table-6-C12mim Tf2N

TI – Tolerance Interval  $Z_{OL}:Z_{OU}$   
 DI – Interval of Typical Data  $Z_L:Z_U$   
 LEL – Local Estimate of Location  $Z_0$

| Temp.[C] | [C12mim][Tf2N] + MWCNT (1% wt.) [J/gK] |             |             |             |             |
|----------|----------------------------------------|-------------|-------------|-------------|-------------|
|          | $Z_L$                                  | $Z_{OL}$    | $Z_0$       | $Z_{OU}$    | $Z_U$       |
| 20       | 1.557356248                            | 1.558230697 | 1.558530221 | 1.558817175 | 1.559523689 |
| 21       | 1.559771324                            | 1.560424577 | 1.560754092 | 1.561047995 | 1.561465466 |
| 22       | 1.561206959                            | 1.561866247 | 1.562387694 | 1.562744033 | 1.562949753 |
| 23       | 1.562058336                            | 1.563100545 | 1.563665648 | 1.564076202 | 1.564422119 |
| 24       | 1.564265689                            | 1.564525346 | 1.565240434 | 1.565774793 | 1.565900842 |
| 25       | 1.56598833                             | 1.566210763 | 1.566889062 | 1.567483339 | 1.567643413 |
| 26       | 1.567194523                            | 1.567603113 | 1.568402259 | 1.568922691 | 1.569059252 |
| 27       | 1.568844192                            | 1.569173772 | 1.569744526 | 1.570057666 | 1.570129172 |
| 28       | 1.57039702                             | 1.570547666 | 1.570963094 | 1.571517898 | 1.571843137 |
| 29       | 1.571822793                            | 1.572327677 | 1.572934167 | 1.573381302 | 1.573593992 |
| 30       | 1.57372144                             | 1.573867621 | 1.57465239  | 1.575235586 | 1.575308793 |
| 31       | 1.575524057                            | 1.575752599 | 1.576066845 | 1.576375936 | 1.576593642 |
| 32       | 1.576897886                            | 1.5770925   | 1.577504939 | 1.578026852 | 1.57840223  |
| 33       | 1.578302889                            | 1.578582402 | 1.579179104 | 1.579730524 | 1.579957446 |
| 34       | 1.580235157                            | 1.580570046 | 1.580937503 | 1.581265243 | 1.5815019   |
| 35       | 1.58150453                             | 1.581759943 | 1.582272057 | 1.582921413 | 1.583421453 |
| 36       | 1.582703072                            | 1.582904457 | 1.583083267 | 1.583355979 | 1.584642968 |
| 37       | 1.584146225                            | 1.584457489 | 1.584919988 | 1.585598382 | 1.586672676 |
| 38       | 1.586195387                            | 1.586275355 | 1.58651992  | 1.587174384 | 1.588711915 |
| 39       | 1.588107802                            | 1.588250305 | 1.588510125 | 1.588973612 | 1.589885138 |
| 40       | 1.58975523                             | 1.589807111 | 1.589987783 | 1.590473131 | 1.591354958 |
| 41       | 1.591308773                            | 1.591545311 | 1.591925684 | 1.592498598 | 1.593364654 |
| 42       | 1.592906008                            | 1.593284943 | 1.593555086 | 1.593895193 | 1.5949016   |
| 43       | 1.594907748                            | 1.595428144 | 1.595737673 | 1.596077227 | 1.59684389  |
| 44       | 1.596644535                            | 1.596963829 | 1.597235225 | 1.597556871 | 1.598156573 |
| 45       | 1.598328028                            | 1.598922717 | 1.59913514  | 1.599341865 | 1.599861741 |
| 46       | 1.599785757                            | 1.600407742 | 1.600606016 | 1.60078707  | 1.601185335 |
| 47       | 1.600326355                            | 1.600755955 | 1.601114577 | 1.60151578  | 1.602161116 |
| 48       | 1.603164211                            | 1.603608771 | 1.603817502 | 1.604021665 | 1.604425865 |
| 49       | 1.605052195                            | 1.605085973 | 1.605184441 | 1.605489343 | 1.606878796 |
| 50       | 1.60548707                             | 1.606451548 | 1.606828983 | 1.607220192 | 1.60837586  |
| 51       | 1.606786895                            | 1.608744335 | 1.609314578 | 1.609786151 | 1.610214826 |
| 52       | 1.609309425                            | 1.609669379 | 1.610100652 | 1.610618619 | 1.611271767 |
| 53       | 1.611008074                            | 1.611705438 | 1.612103146 | 1.61237006  | 1.61255683  |
| 54       | 1.61300428                             | 1.613571206 | 1.613978271 | 1.614319567 | 1.614633139 |
| 55       | 1.614573442                            | 1.61487892  | 1.615094095 | 1.615365173 | 1.61618539  |
| 56       | 1.615800853                            | 1.616708708 | 1.617083771 | 1.617410889 | 1.617923642 |
| 57       | 1.617807396                            | 1.617936951 | 1.618104427 | 1.618397856 | 1.619469572 |
| 58       | 1.620044171                            | 1.621035812 | 1.621264348 | 1.621427731 | 1.621644108 |
| 59       | 1.620971449                            | 1.621515933 | 1.62186684  | 1.622241949 | 1.622950825 |
| 60       | 1.622391617                            | 1.622713818 | 1.623132123 | 1.623682777 | 1.624474177 |
| 61       | 1.621350661                            | 1.623951136 | 1.624661965 | 1.625233293 | 1.626171852 |
| 62       | 1.624140376                            | 1.624508959 | 1.625082823 | 1.625934965 | 1.627236505 |

Table-6-C12mim Tf2N

|    |             |             |             |             |             |
|----|-------------|-------------|-------------|-------------|-------------|
| 63 | 1.627608991 | 1.628064696 | 1.628510677 | 1.628939281 | 1.629340384 |
| 64 | 1.627633343 | 1.62858434  | 1.629243942 | 1.629843011 | 1.630520918 |
| 65 | 1.631580203 | 1.631679465 | 1.631749046 | 1.631842117 | 1.6322166   |
| 66 | 1.632667098 | 1.632873657 | 1.633044001 | 1.633283413 | 1.634165395 |
| 67 | 1.633174985 | 1.633642339 | 1.633925804 | 1.634268619 | 1.635374899 |
| 68 | 1.635515364 | 1.635787963 | 1.636500904 | 1.636793059 | 1.636825874 |
| 69 | 1.63668826  | 1.637951777 | 1.63833983  | 1.638633549 | 1.639020044 |
| 70 | 1.637319281 | 1.639027083 | 1.639379759 | 1.639559003 | 1.639684153 |

Table-7-IC\_Analysis-C10mim Tf2N

**[C10mim][Tf2N] – Ion Chromatography**

| No.                 | note                  | Amount (ppm)   | Amount (ppm)    | Amount (ppm)     | Amount (ppm)     |
|---------------------|-----------------------|----------------|-----------------|------------------|------------------|
|                     |                       | F <sup>-</sup> | Cl <sup>-</sup> | NO <sup>-2</sup> | SO <sup>-4</sup> |
| [C10mim][Tf2N]_1    | original sample       | n.a.           | 4230.619        | n.a.             | 7727.876         |
| [C10mim][Tf2N]_2    | purified sample       | n.a.           | 2385.48         | n.a.             | 6008.889         |
| [C10mim][Tf2N]_3    | purified sample       | n.a.           | 1510.036        | n.a.             | 2120.919         |
| [C10mim][Tf2N]_pure | average of purified s | n.a.           | 1947.758        | n.a.             | 4064.904         |

Table-7-IC\_Analysis-C10mim Tf2N

| Amount (ppm)    | Amount (ppm)     | Amount (ppm) | Amount (ppm)                   | Amount (ppm)    | Amount (ppm)    | Amount (ppm)                 |
|-----------------|------------------|--------------|--------------------------------|-----------------|-----------------|------------------------------|
| Br <sup>-</sup> | NO <sup>-3</sup> | Oxa          | H <sub>2</sub> PO <sub>4</sub> | Li <sup>+</sup> | Na <sup>+</sup> | NH <sub>4</sub> <sup>+</sup> |
| 9514.973        | 10330.077        | 1425.813     | n.a.                           | n.a.            | 1912.994        | 1071.616                     |
| 933.561         | 3353.825         | 1245.087     | n.a.                           | n.a.            | 637.683         | 394.393                      |
| 395.834         | 2946.738         | 423.161      | n.a.                           | n.a.            | 413.959         | 176.243                      |
| 664.697         | 3150.282         | 834.124      | n.a.                           | n.a.            | 525.821         | 285.318                      |

Table-7-IC\_Analysis-C10mim Tf2N

| Amount (ppm)   | Amount (ppm)    | Amount (ppm)    |
|----------------|-----------------|-----------------|
| K <sup>+</sup> | Mg <sup>+</sup> | Ca <sup>+</sup> |
| 309.841        | 337.307         | 3426.6          |
| 487.879        | 289.664         | 2428.251        |
| 323.157        | 93.262          | 890.822         |
| 405.518        | 191.463         | 1659.536        |
